# Supplementary figures and images for: SMC condensin entraps chromosomal DNA by an ATP hydrolysis dependent loading mechanism in Bacillus subtilis
Source: eLife journal article supplement (doi:10.7554/elife.06659), 2015-05-07

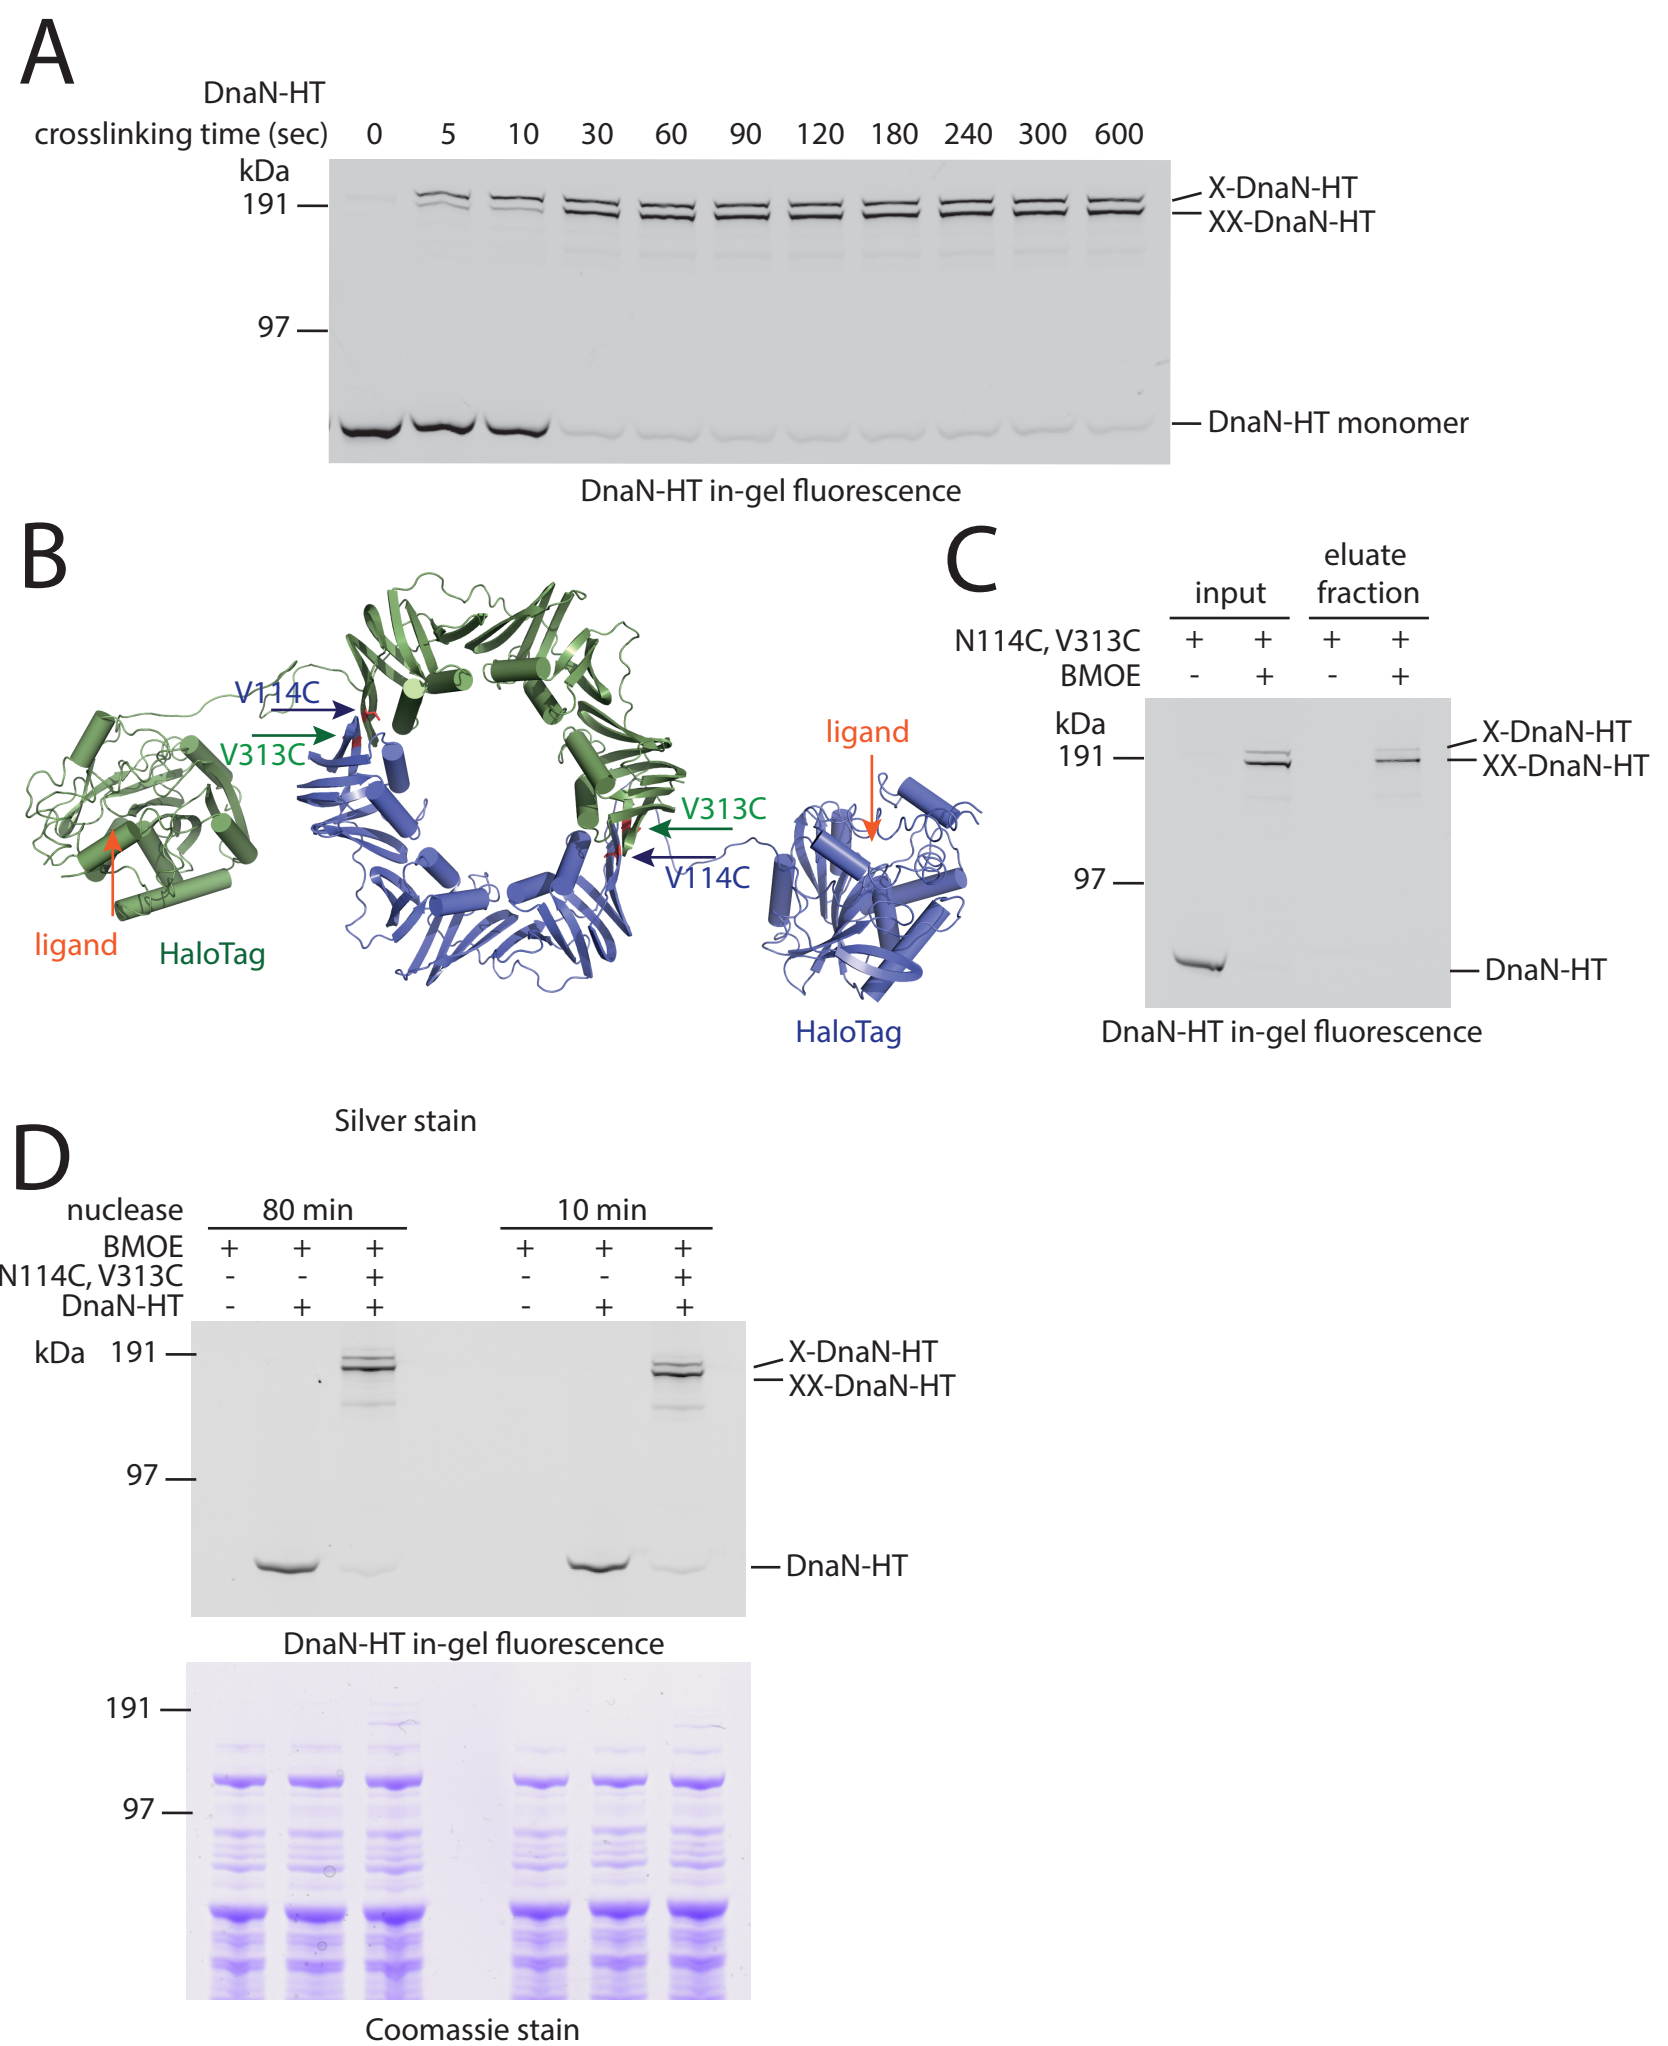

Figure 1-figure supplement 1

Supplement: supp [file elife_poa_e06659_Figure_1_figure_supplement_1.pdf › elife_poa_e06659_Figure_1_figure_supplement_1.pdf]

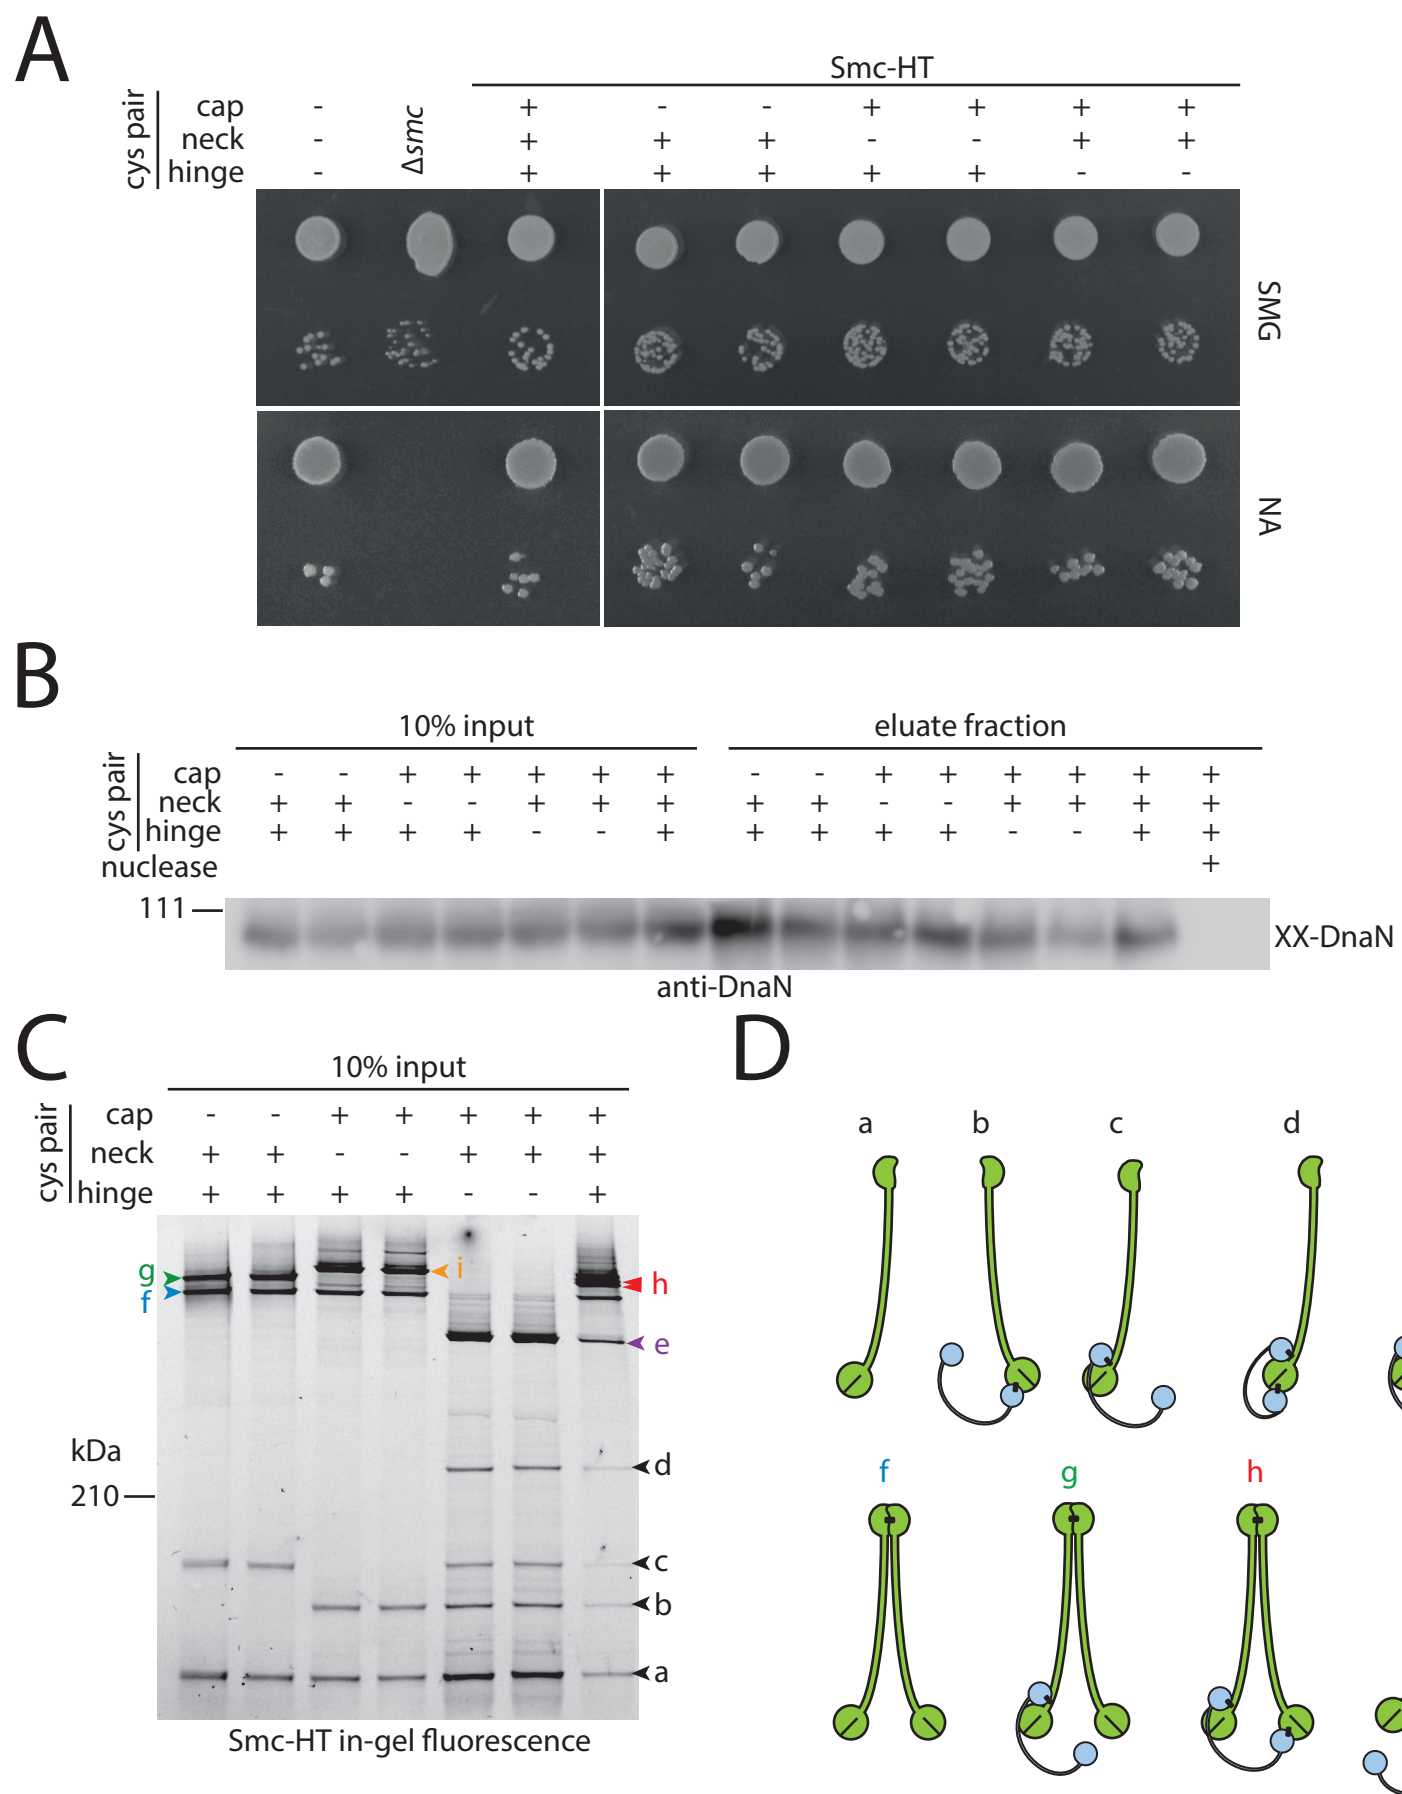

Figure 2-figure supplement 1

Supplement: supp [file elife_poa_e06659_Figure_2_figure_supplement_1.pdf › elife_poa_e06659_Figure_2_figure_supplement_1.pdf]

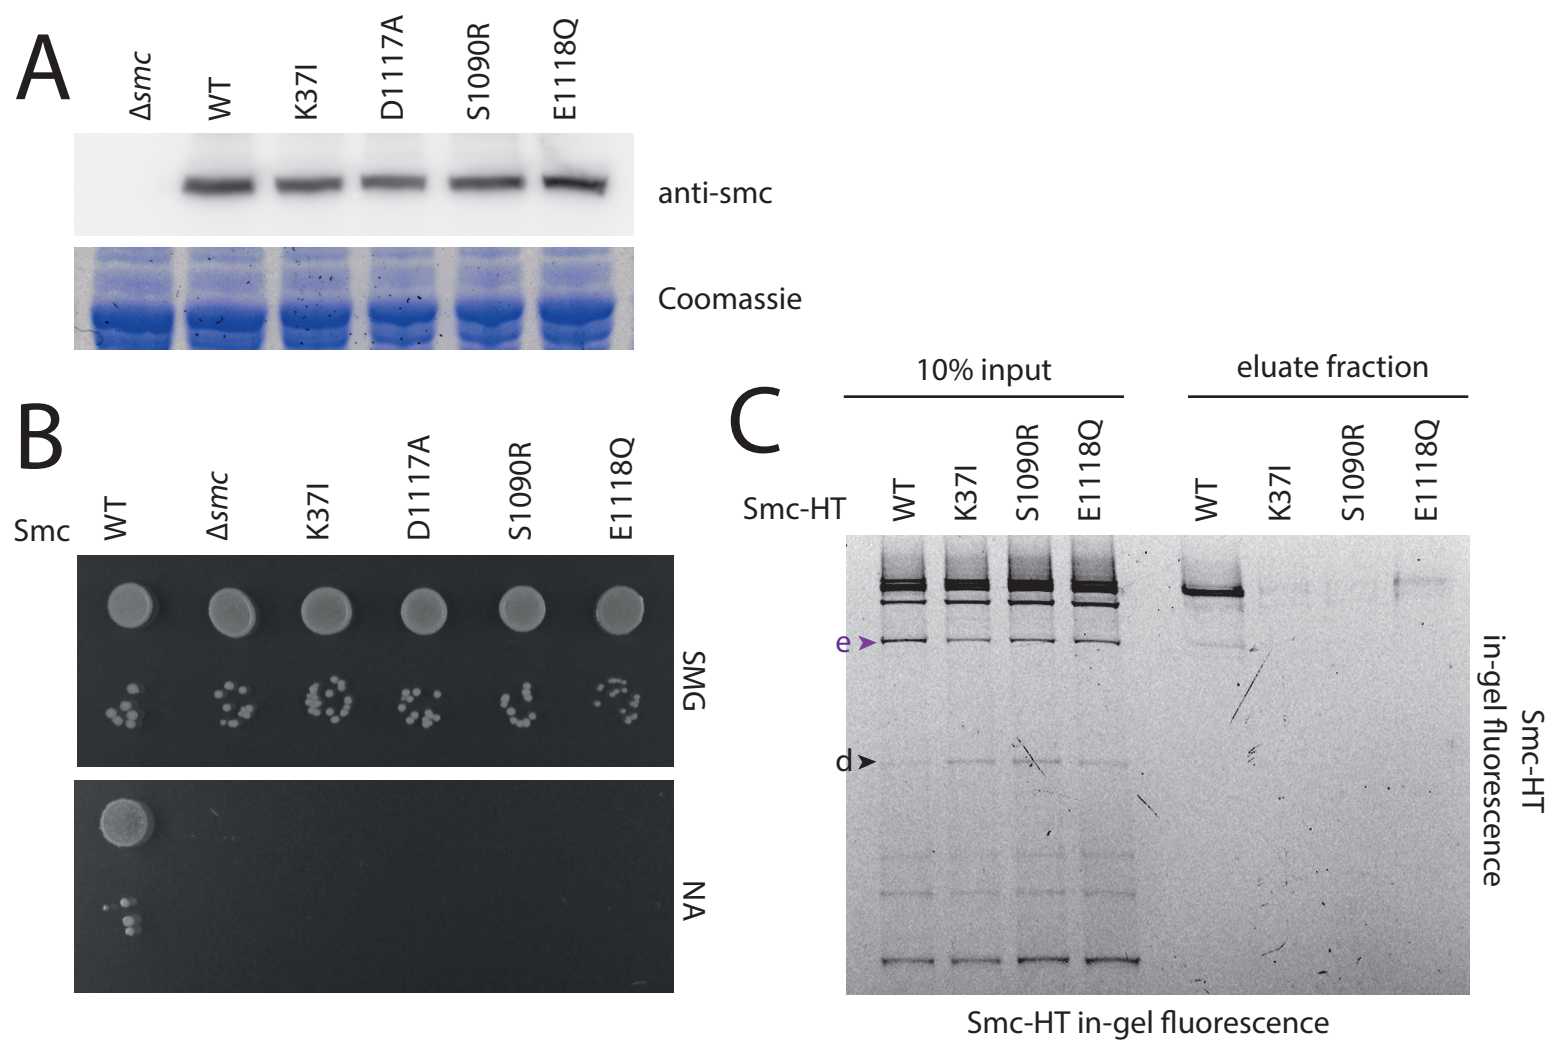

Figure 3-figure supplement 1

Supplement: supp [file elife_poa_e06659_Figure_3_figure_supplement_1.pdf › elife_poa_e06659_Figure_3_figure_supplement_1.pdf]

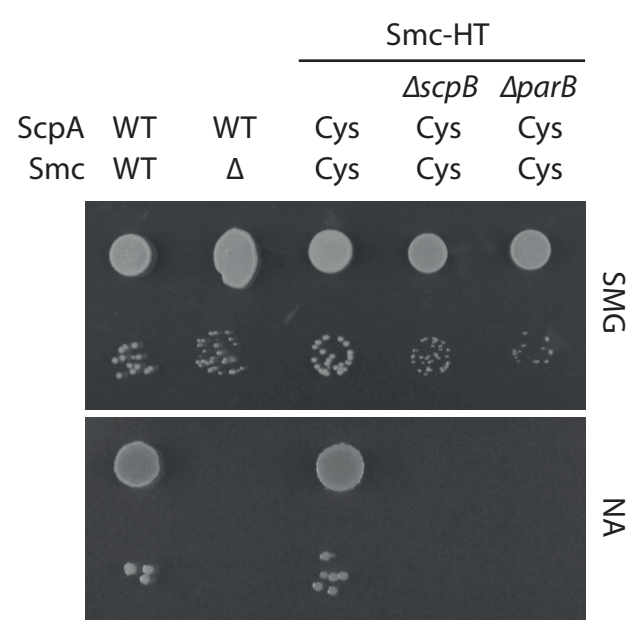

Figure 4-figure supplement 1

Supplement: supp [file elife_poa_e06659_Figure_4_figure_supplement_1.pdf › elife_poa_e06659_Figure_4_figure_supplement_1.pdf]

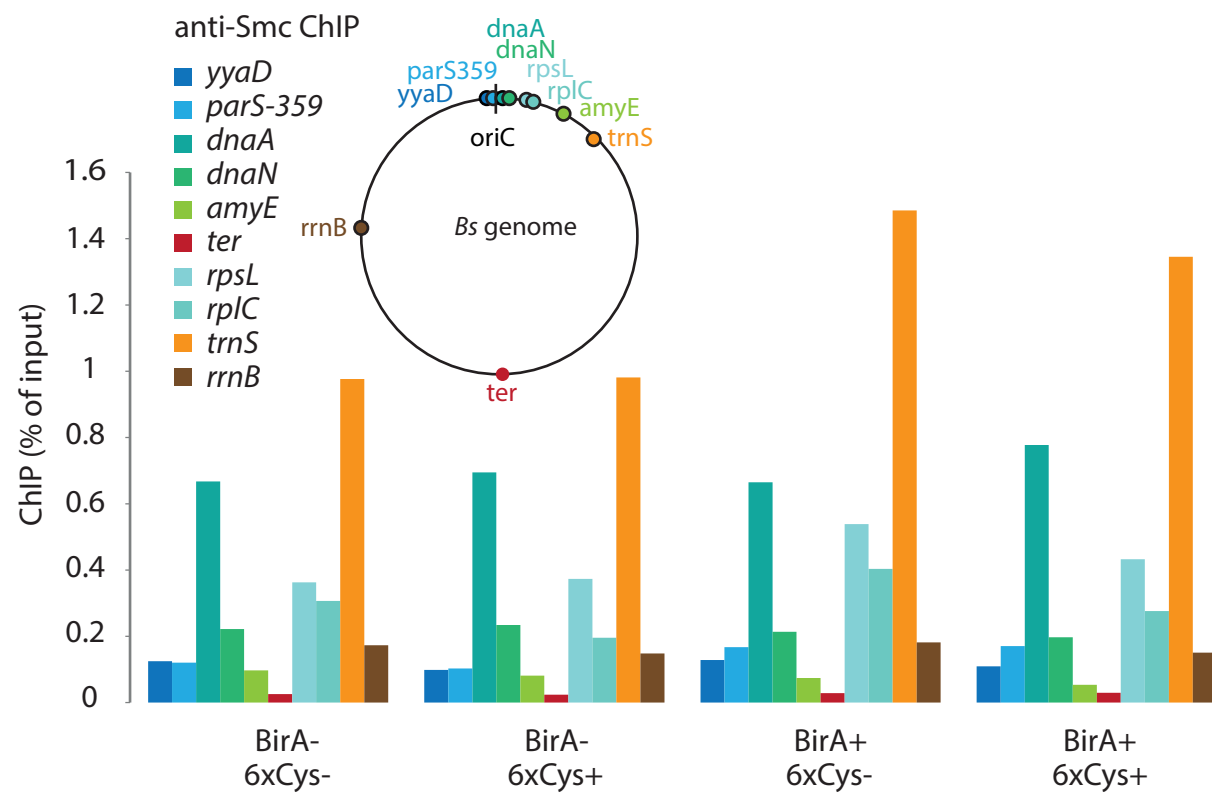

Figure 5-figure supplement 1

Supplement: supp [file elife_poa_e06659_Figure_5_figure_supplement_1.pdf › elife_poa_e06659_Figure_5_figure_supplement_1.pdf]

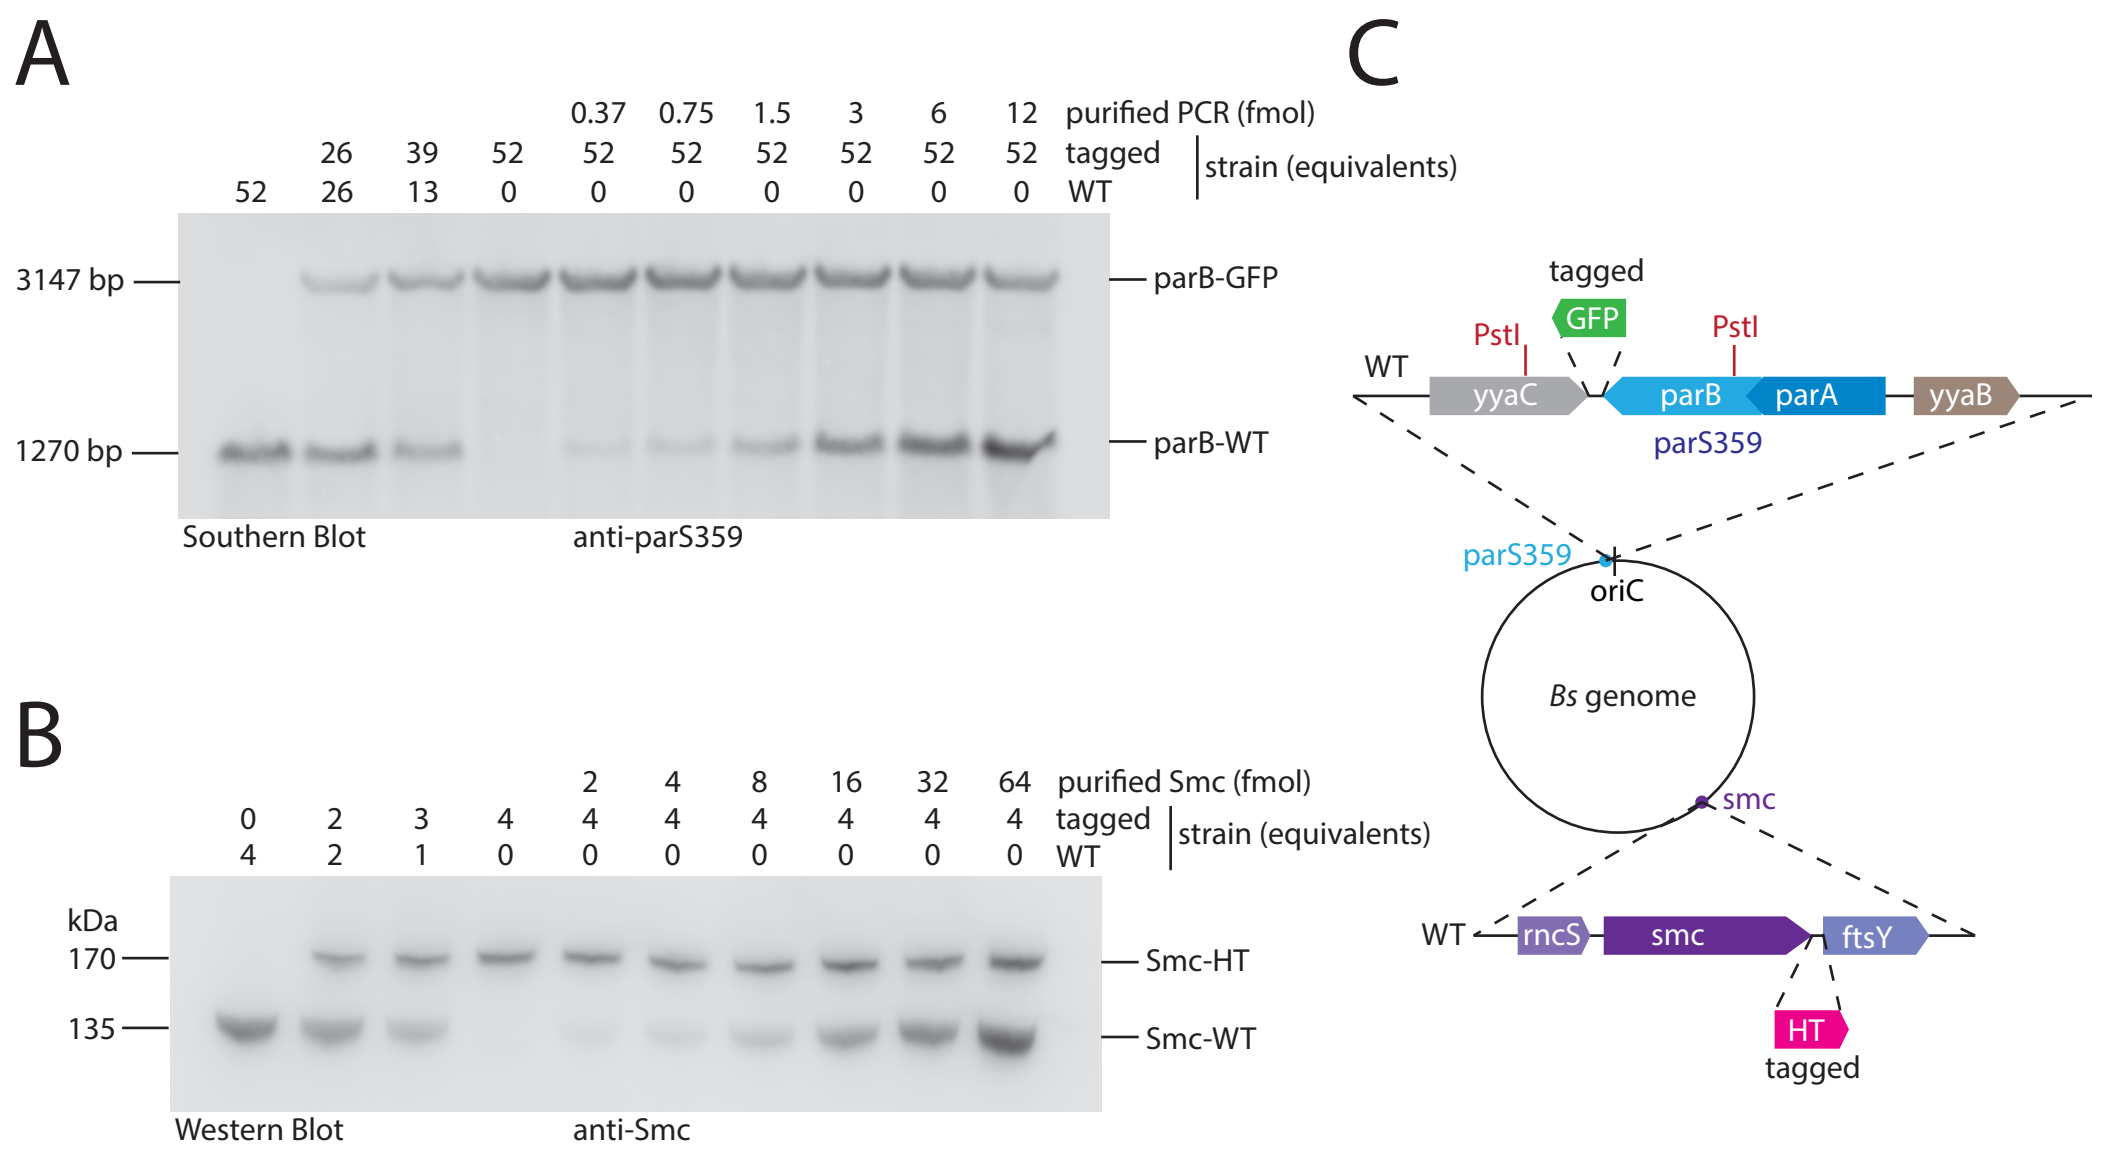

Figure 6-figure supplement 1

Supplement: supp [file elife_poa_e06659_Figure_6_figure_supplement_1.pdf › elife_poa_e06659_Figure_6_figure_supplement_1.pdf]
